# Supplementary material for: A rare 4-connected neb topological metal–organic framework with ferromagnetic characteristics
Source: Royal Society of Chemistry journal article supplement (doi:10.1039/c2ce06202j), 2012-01-01
Supplement: c2ce06202j.pdf [file c2ce06202j.pdf]

## Supporting Information

### **A rare 4-connected net topological metal-organic framework with ferromagnetic characteristic**

Sheng-Qi Guo, Dan Tian, Xiang Zheng and Hong Zhang \*

*Institute of Polyoxometalate Chemistry, Department of Chemistry, Northeast Normal*

*University, Changchun, Jilin 130024, P.R. China*

\* Corresponding author.

E-mail: [zhangh@nenu.edu.cn](mailto:zhangh@nenu.edu.cn)

Table S1. Bond lengths [Å] and angles [°] for **1**<sup>a</sup>.

|                    |            |                  |            |
|--------------------|------------|------------------|------------|
| Ni(1)–O(4)         | 2.053(2)   | Ni(1)–O3         | 2.051(2)   |
| Ni(1)–N(2)         | 2.088(3)   | Ni(1)–O1         | 2.094(2)   |
| Ni(1)–O(1W)        | 2.0990(17) | Ni(1)–N1         | 2.102(3)   |
| Ni(1A)–O(1W)       | 2.0990(17) | O(3)–Ni(1)–O(4)  | 96.17(11)  |
| O(3)–Ni(1)–N(2)    | 89.46(12)  | O(4)–Ni(1)–N(2)  | 92.83(12)  |
| O(3)–Ni(1)–O(1)    | 87.09(9)   | O(4)–Ni(1)–O(1)  | 175.03(10) |
| N(2)–Ni(1)–O(1)    | 83.43(11)  | O(3)–Ni(1)–O(1W) | 91.17(8)   |
| O(4)–Ni(1)–O(1W)   | 91.88(9)   | N(2)–Ni(1)–O(1W) | 175.15(12) |
| O(1)–Ni(1)–O(1W)   | 91.80(8)   | O(3)–Ni(1)–N(1)  | 170.64(13) |
| O(4)–Ni(1)–N(1)    | 90.01(13)  | N(2)–Ni(1)–N(1)  | 83.20(15)  |
| O(1)–Ni(1)–N(1)    | 86.30(12)  | O(1W)–Ni(1)–N(1) | 95.66(12)  |
| Ni(1A)–O(1W)–Ni(1) | 115.28(14) |                  |            |

<sup>a</sup> symmetry codes: A: -x+1, -y, z.

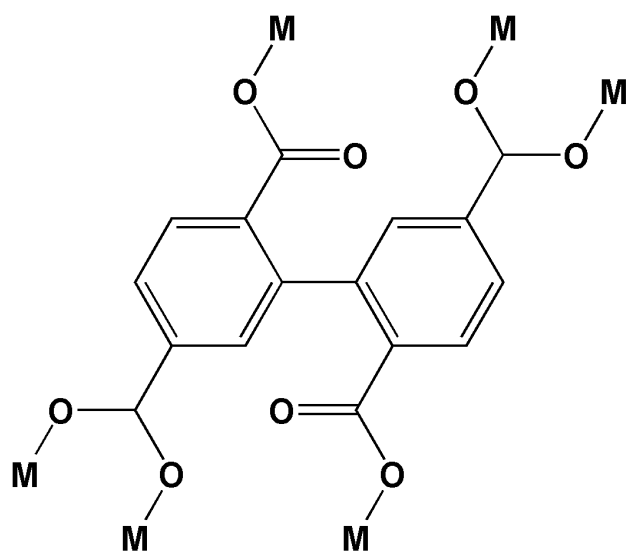

**Chart. S1** Coordination modes of H<sub>4</sub>bptc in **1**.

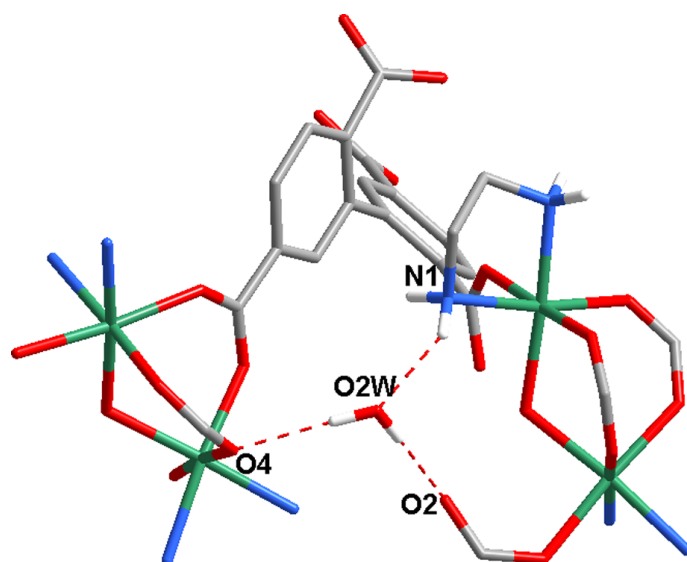

**Fig. S1** Hydrogen bonds between the main structure and free water molecule.

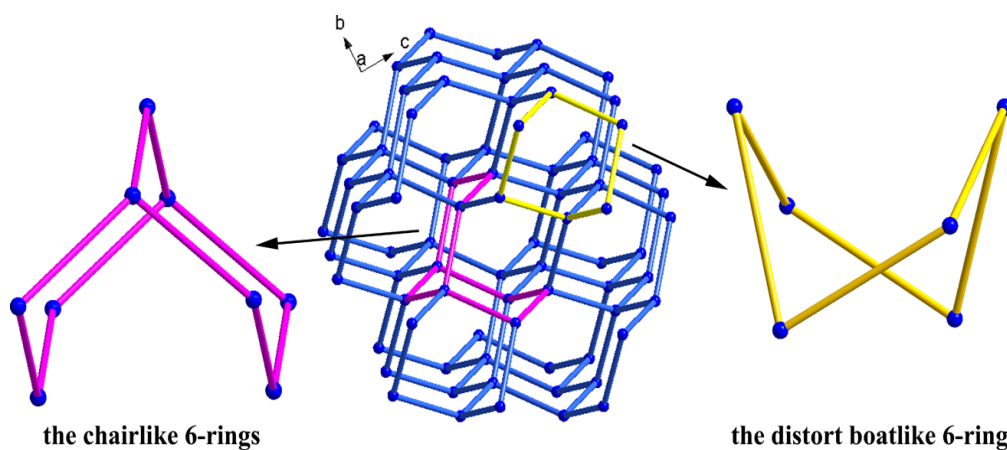

**Fig. S2** The chairlike and distorted boatlike 6-rings in the basic unit of this topological network.

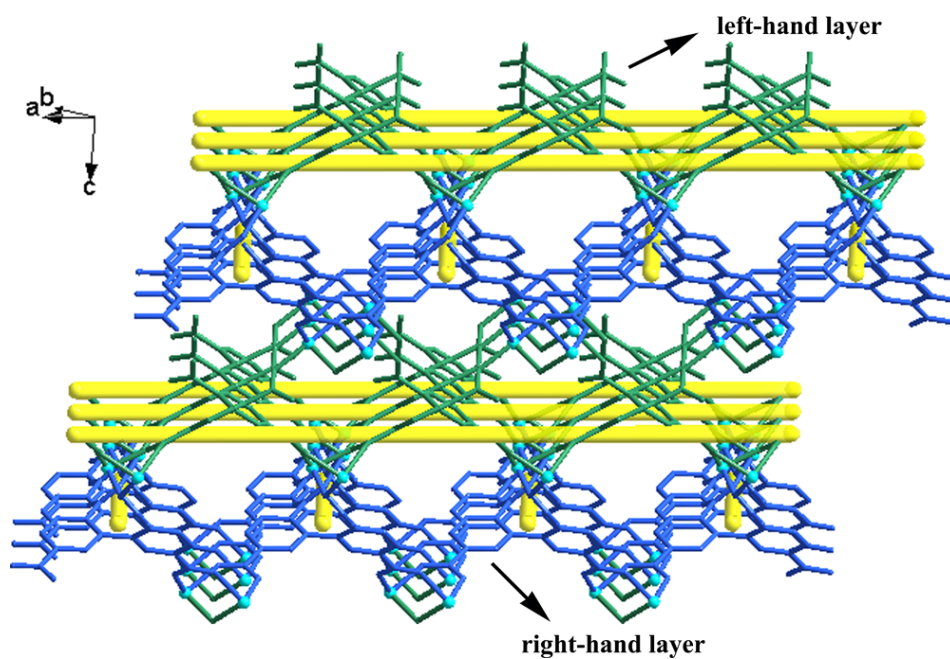

**Fig. S3** The perpendicular arrangement of the helices in adjacent layers of **1**.

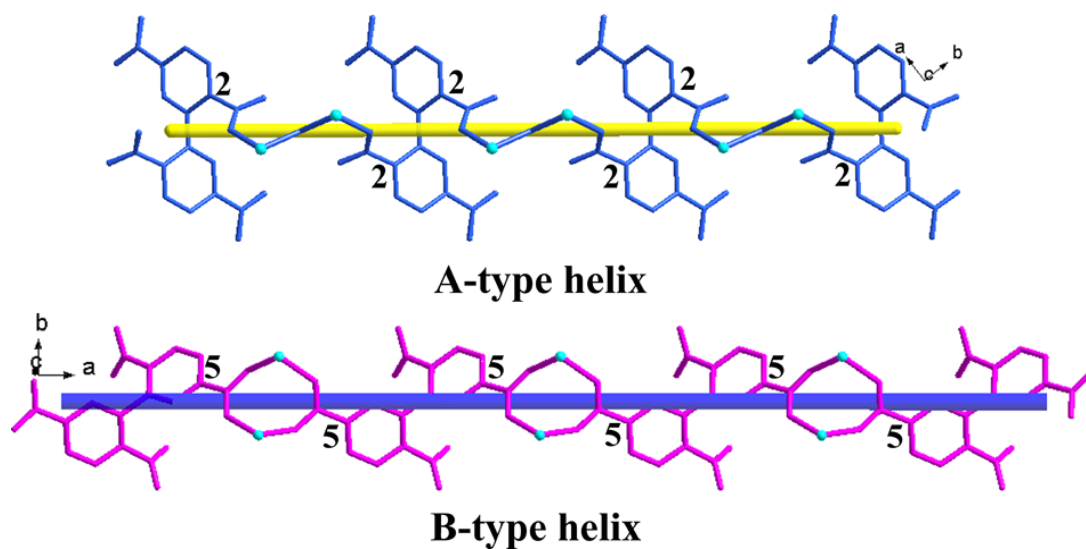

Fig. S4 The A-type and B-type helical chains in 1.

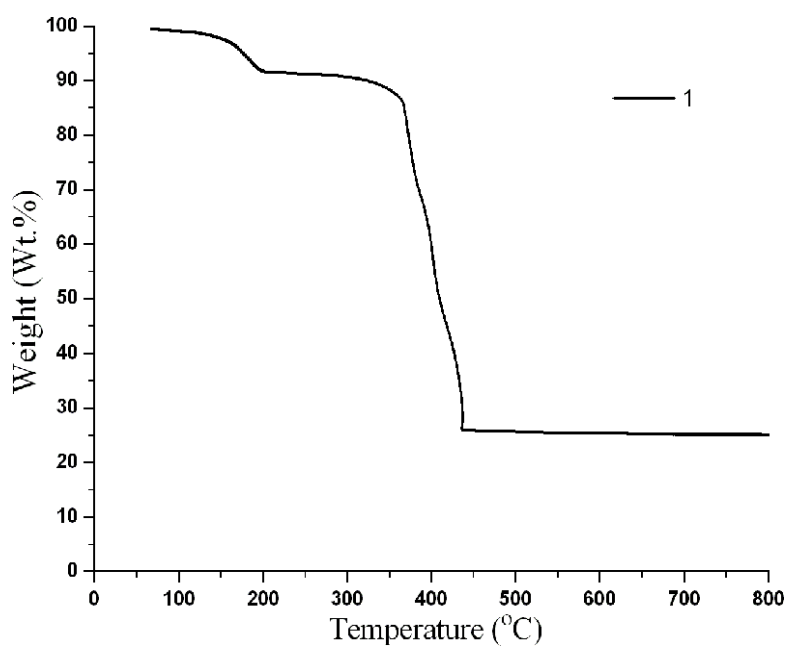

Fig. S5 Thermogravimetric curve of complex 1.

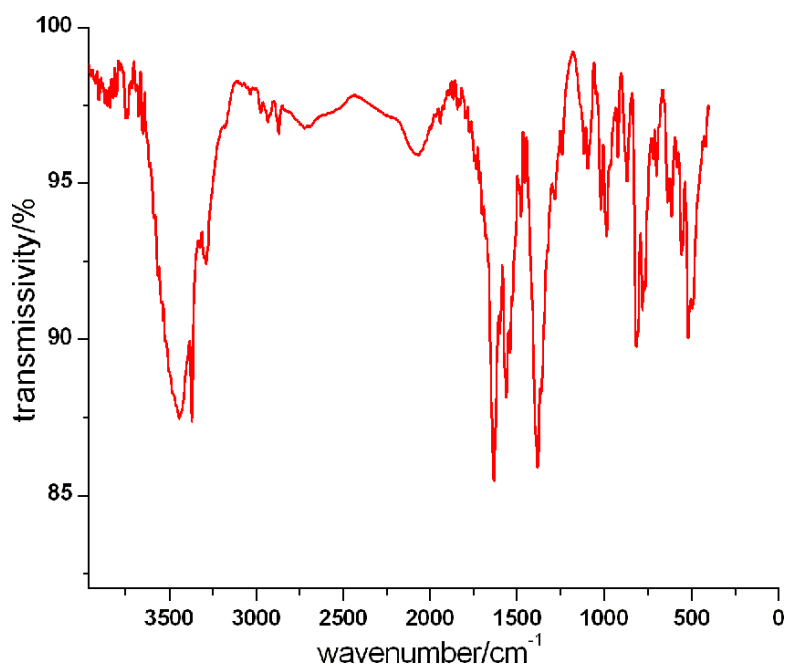

**Fig. S6** IR spectrum of complex 1.

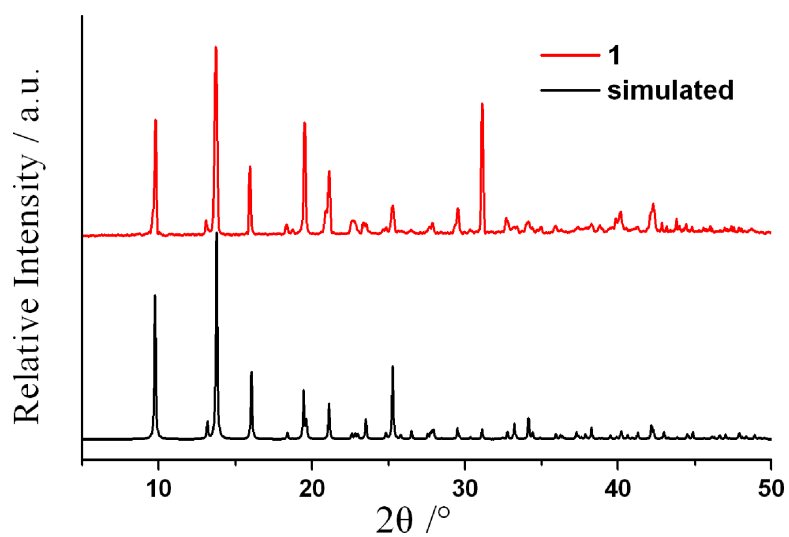

**Fig. S7** The PXRD patterns of complex 1: the as-synthesized patterns (red) and the simulated based on X-ray single-crystal data (black).
